# Supplementary material
Source: PubMed Central journal article supplement (PMC5470043)

Source Data Figure 1J

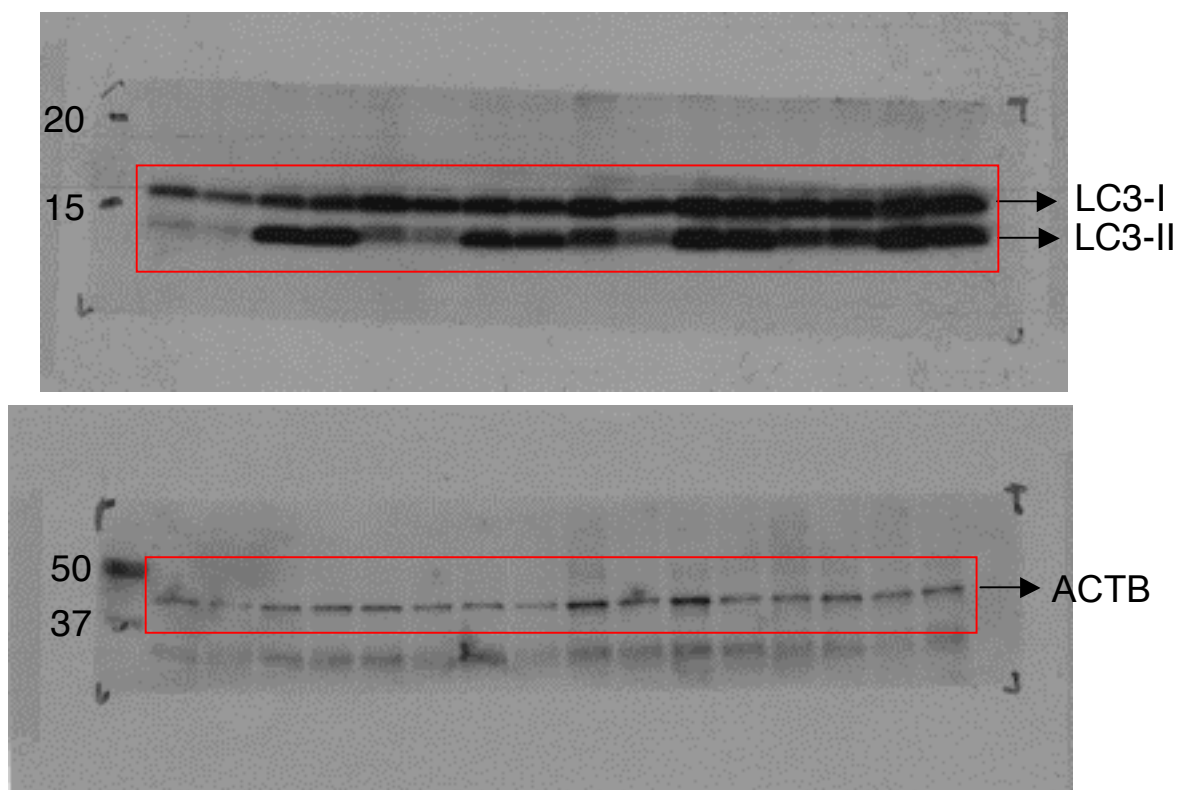

Supplement: EMBJ-36-1688-s003.pdf [file EMBJ-36-1688-s003.pdf]

Source Data EV1D

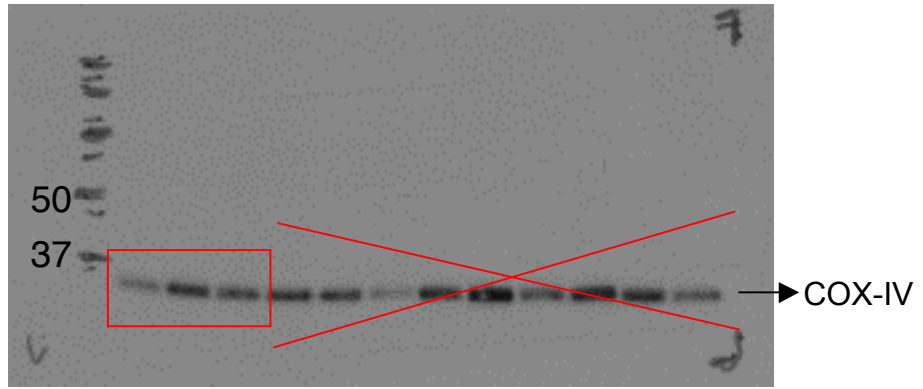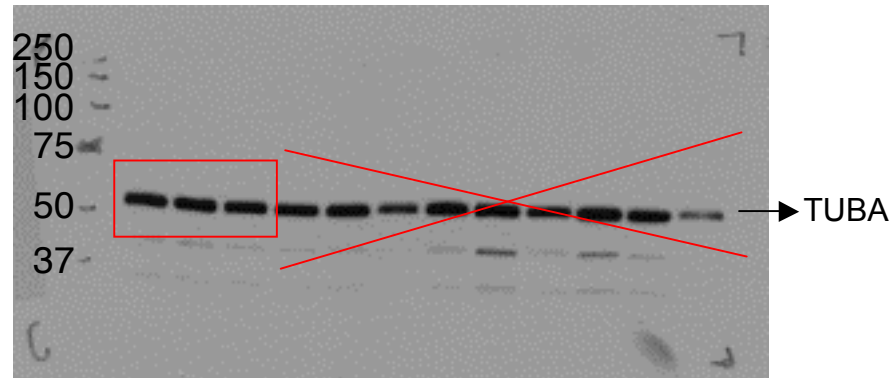

Supplement: EMBJ-36-1688-s004.pdf [file EMBJ-36-1688-s004.pdf]
